# Supplementary material
Source: PubMed Central journal article supplement (PMC9015508)
Supplement: JMV-94-1617-s001.pdf [file JMV-94-1617-s001.pdf]

**A**

Cumulative Probabilities

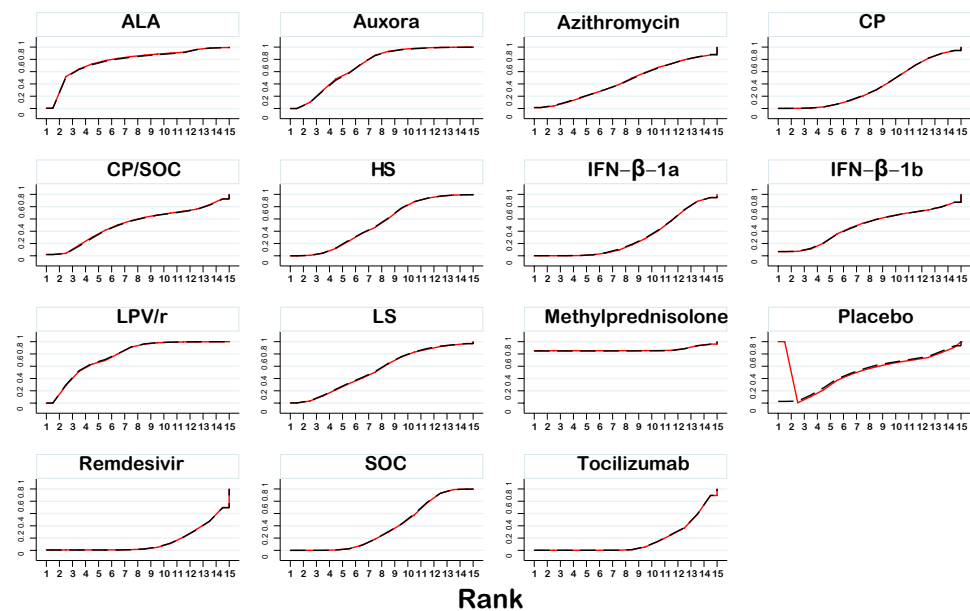

— Estimated probabilities    - - - - Predictive probabilities

Graphs by Treatment

**B**

Cumulative Probabilities

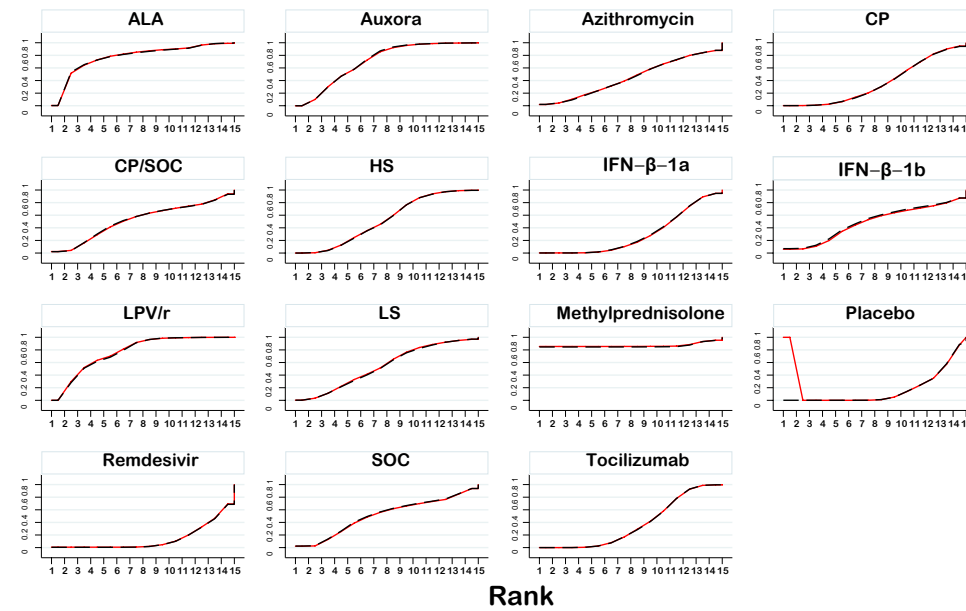

— Estimated probabilities    - - - - Predictive probabilities

Graphs by Treatment

**C**

Cumulative Probabilities

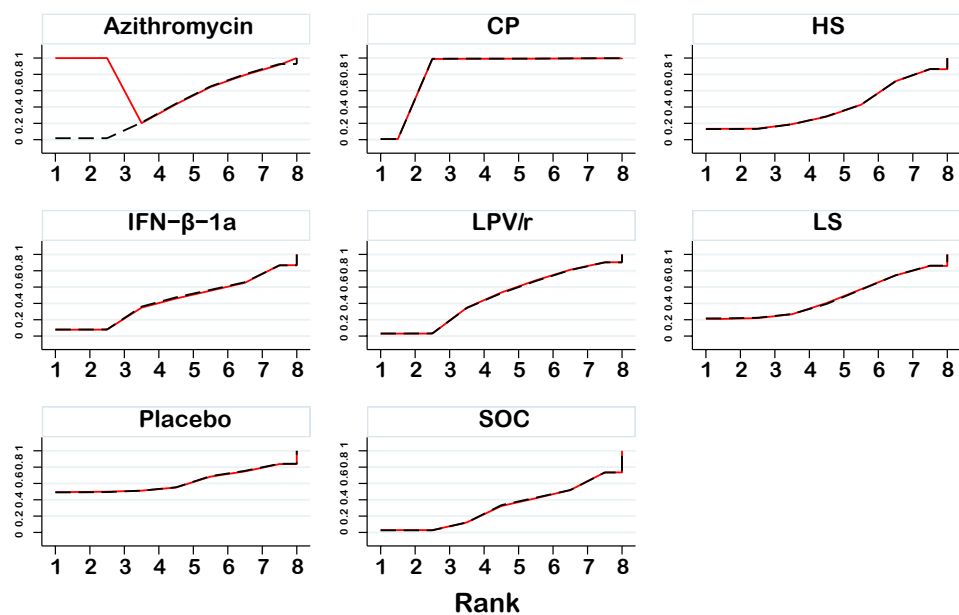

— Estimated probabilities    - - - - Predictive probabilities

Graphs by Treatment

**D**

Cumulative Probabilities

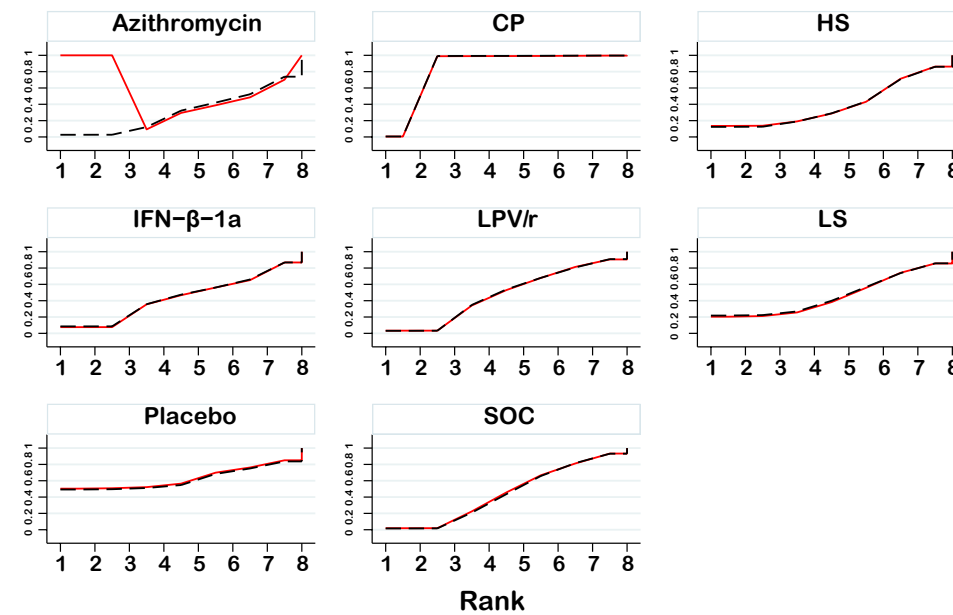

— Estimated probabilities    - - - - Predictive probabilities

Graphs by Treatment
