# Supplementary material
Source: PubMed Central journal article supplement (PMC9015508)
Supplement: JMV-94-1617-s003.pdf [file JMV-94-1617-s003.pdf]

TABLES S2 Rating of individual items of the Risk of Bias tool for each study

Note: CSR: Clinical Study Report

Avendano Sola C et al [17]

| ITEM                            | RATING  | SUPPORT                                                                                                         |
|---------------------------------|---------|-----------------------------------------------------------------------------------------------------------------|
| Random sequence generation      | LOW     | Received medications and placebo in a random order, double-blind .                                              |
| Allocation concealment          | LOW     | Information from full CSR, Method of Assigning Subjects to Treatment Groups.                                    |
| Blinding participants/personnel | UNCLEAR | Not specified.                                                                                                  |
| Blinding assessor               | UNCLEAR | Not specified.                                                                                                  |
| Incomplete data outcome         | LOW     | Outcomes relevant for the present meta-analysis mentioned in the full CSR were reported in the Journal article. |
| Selective reporting             | UNCLEAR | Not specified.                                                                                                  |
| Other bias                      | LOW     | All reported in published papers.                                                                               |
| Notes                           |         | First author unable to provide additional details.                                                              |

Cao B et al [18]

| ITEM                            | RATING  | SUPPORT                                                                                                         |
|---------------------------------|---------|-----------------------------------------------------------------------------------------------------------------|
| Random sequence generation      | LOW     | Received medications and placebo in a random order, double-blind .                                              |
| Allocation concealment          | LOW     | Information from full CSR, Method of Assigning Subjects to Treatment Groups.                                    |
| Blinding participants/personnel | UNCLEAR | Not specified.                                                                                                  |
| Blinding assessor               | UNCLEAR | Not specified.                                                                                                  |
| Incomplete data outcome         | LOW     | Outcomes relevant for the present meta-analysis mentioned in the full CSR were reported in the Journal article. |
| Selective reporting             | UNCLEAR | Not specified.                                                                                                  |
| Other bias                      | UNCLEAR | No details on other bias.                                                                                       |
| Notes                           |         | First author unable to provide additional details.                                                              |

Davoudi-Monfared E et al [19]

| ITEM                            | RATING  | SUPPORT                                                                                                         |
|---------------------------------|---------|-----------------------------------------------------------------------------------------------------------------|
| Random sequence generation      | LOW     | Received medications and placebo in a random order, double-blind .                                              |
| Allocation concealment          | LOW     | Information from full CSR, Method of Assigning Subjects to Treatment Groups.                                    |
| Blinding participants/personnel | UNCLEAR | No protocol/CSR available.                                                                                      |
| Blinding assessor               | UNCLEAR | No protocol/CSR available.                                                                                      |
| Incomplete data outcome         | LOW     | Outcomes relevant for the present meta-analysis mentioned in the full CSR were reported in the Journal article. |
| Selective reporting             | UNCLEAR | No details on selective reporting.                                                                              |
| Other bias                      | UNCLEAR | No details on other bias.                                                                                       |

|       |                                                                        |
|-------|------------------------------------------------------------------------|
| Notes | First author contacted but not able to provide additional information. |
|-------|------------------------------------------------------------------------|

**Edalatifard M et al [20]**

| ITEM                            | RATING                                             | SUPPORT                                                                             |
|---------------------------------|----------------------------------------------------|-------------------------------------------------------------------------------------|
| Random sequence generation      | LOW                                                | Received medications and placebo in a random order, double-blind .                  |
| Allocation concealment          | LOW                                                | Information from journal article, Method of Assigning Subjects to Treatment Groups. |
| Blinding participants/personnel | UNCLEAR                                            | No protocol/CSR available.                                                          |
| Blinding assessor               | UNCLEAR                                            | No protocol/CSR available.                                                          |
| Incomplete data outcome         | UNCLEAR                                            | No protocol/CSR available.                                                          |
| Selective reporting             | UNCLEAR                                            | No protocol/CSR available.                                                          |
| Other bias                      | LOW                                                | All outcomes of relevance reported in published journal article.                    |
| Notes                           | First author unable to provide additional details. |                                                                                     |

**Furtado RHM et al [21]**

| ITEM                            | RATING  | SUPPORT                                                                                                                                                          |
|---------------------------------|---------|------------------------------------------------------------------------------------------------------------------------------------------------------------------|
| Random sequence generation      | LOW     | Received medications and placebo in a random order, double-blind .                                                                                               |
| Allocation concealment          | LOW     | Information from full CSR, Method of Assigning Subjects to Treatment Groups.                                                                                     |
| Blinding participants/personnel | LOW     | “Investigator and the patient were blinded to treatment. To maintain blinding, all investigational products were supplied.” Information from full CSR, Blinding. |
| Blinding assessor               | LOW     | “Investigator and the patient were blinded to treatment. To maintain blinding, all investigational products were supplied.” Information from full CSR, Blinding. |
| Incomplete data outcome         | LOW     | Outcomes relevant for the present meta-analysis mentioned in the full CSR were reported in the journal article.                                                  |
| Selective reporting             | UNCLEAR | No protocol/CSR available.                                                                                                                                       |
| Other bias                      | LOW     | All outcomes of relevance reported in published journal article.                                                                                                 |

**Lescure FX et al [22]**

| ITEM                            | RATING | SUPPORT                                                                                                                                                          |
|---------------------------------|--------|------------------------------------------------------------------------------------------------------------------------------------------------------------------|
| Random sequence generation      | LOW    | Received medications and placebo in a random order, double-blind .                                                                                               |
| Allocation concealment          | LOW    | Information from full CSR, Method of Assigning Subjects to Treatment Groups.                                                                                     |
| Blinding participants/personnel | LOW    | “Investigator and the patient were blinded to treatment. To maintain blinding, all investigational products were supplied.” Information from full CSR, Blinding. |
| Blinding assessor               | LOW    | “Investigator and the patient were blinded to treatment. To maintain blinding, all investigational products were supplied.” Information from full CSR, Blinding. |
| Incomplete data outcome         | LOW    | Outcomes relevant for the present meta-analysis mentioned in the full CSR were reported in the journal article.                                                  |
| Selective reporting             | LOW    | All outcomes listed in clinicaltrials.gov were reported in the journal article (which included additional outcomes).                                             |

|            |                                                     |                |
|------------|-----------------------------------------------------|----------------|
| Other bias | UNCLEAR                                             | Not specified. |
| Notes      | Authors not able to provide additional information. |                |

**Li L et al [23]**

| ITEM                            | RATING                                                                 | SUPPORT                                                                                         |
|---------------------------------|------------------------------------------------------------------------|-------------------------------------------------------------------------------------------------|
| Random sequence generation      | LOW                                                                    | Received medications and placebo in a random order, double-blind .                              |
| Allocation concealment          | LOW                                                                    | Information from the Journal article, Method of Assigning Subjects to Treatment Groups.         |
| Blinding participants/personnel | UNCLEAR                                                                | No protocol/CSR available.                                                                      |
| Blinding assessor               | UNCLEAR                                                                | No protocol/CSR available.                                                                      |
| Incomplete data outcome         | LOW                                                                    | Outcomes relevant for the present meta-analysis mentioned were reported in the Journal article. |
| Selective reporting             | UNCLEAR                                                                | No protocol/CSR available.                                                                      |
| Other bias                      | LOW                                                                    | All reported in published papers.                                                               |
| Notes                           | First author contacted but not able to provide additional information. |                                                                                                 |

**Miller J et al [24]**

| ITEM                            | RATING                                                       | SUPPORT                                                                          |
|---------------------------------|--------------------------------------------------------------|----------------------------------------------------------------------------------|
| Random sequence generation      | LOW                                                          | Received medications and placebo in a random order, double-blind .               |
| Allocation concealment          | LOW                                                          | Information from full article, Method of Assigning Subjects to Treatment Groups. |
| Blinding participants/personnel | UNCLEAR                                                      | No protocol/CSR available.                                                       |
| Blinding assessor               | UNCLEAR                                                      | No protocol/CSR available.                                                       |
| Incomplete data outcome         | UNCLEAR                                                      | No protocol/CSR available.                                                       |
| Selective reporting             | UNCLEAR                                                      | No protocol/CSR available.                                                       |
| Other bias                      | HIGH                                                         | No information on how other bias was preserved.                                  |
| Notes                           | Corresponding author not able to provide additional details. |                                                                                  |

**Olender SA et al [25]**

| ITEM                            | RATING  | SUPPORT                                                                                                         |
|---------------------------------|---------|-----------------------------------------------------------------------------------------------------------------|
| Random sequence generation      | LOW     | Received medications and placebo in a random order, double-blind .                                              |
| Allocation concealment          | LOW     | Information from full CSR, Method of Assigning Subjects to Treatment Groups.                                    |
| Blinding participants/personnel | UNCLEAR | Not specified.                                                                                                  |
| Blinding assessor               | UNCLEAR | Not specified.                                                                                                  |
| Incomplete data outcome         | LOW     | Outcomes relevant for the present meta-analysis mentioned in the full CSR were reported in the Journal article. |
| Selective reporting             | LOW     | Outcomes listed in short CSR reported in the journal article.                                                   |
| Other bias                      | UNCLEAR | Not specified.                                                                                                  |

|       |                                                     |
|-------|-----------------------------------------------------|
| Notes | Authors not able to provide additional information. |
|-------|-----------------------------------------------------|

**Rahmani H et al [26]**

| ITEM                            | RATING                                                                 | SUPPORT                                                                                                         |
|---------------------------------|------------------------------------------------------------------------|-----------------------------------------------------------------------------------------------------------------|
| Random sequence generation      | LOW                                                                    | Received medications and placebo in a random order, double-blind .                                              |
| Allocation concealment          | LOW                                                                    | Information from full CSR, Method of Assigning Subjects to Treatment Groups.                                    |
| Blinding participants/personnel | UNCLEAR                                                                | Not specified.                                                                                                  |
| Blinding assessor               | UNCLEAR                                                                | Not specified.                                                                                                  |
| Incomplete data outcome         | LOW                                                                    | Outcomes relevant for the present meta-analysis mentioned in the full CSR were reported in the Journal article. |
| Selective reporting             | UNCLEAR                                                                | Not specified.                                                                                                  |
| Other bias                      | UNCLEAR                                                                | Not specified.                                                                                                  |
| Notes                           | First author contacted but not able to provide additional information. |                                                                                                                 |

**Rasheed AM et al [27]**

| ITEM                            | RATING                                             | SUPPORT                                                                                                         |
|---------------------------------|----------------------------------------------------|-----------------------------------------------------------------------------------------------------------------|
| Random sequence generation      | LOW                                                | Received medications and placebo in a random order, double-blind .                                              |
| Allocation concealment          | LOW                                                | Information from full CSR, Method of Assigning Subjects to Treatment Groups.                                    |
| Blinding participants/personnel | UNCLEAR                                            | Not specified.                                                                                                  |
| Blinding assessor               | UNCLEAR                                            | Not specified.                                                                                                  |
| Incomplete data outcome         | LOW                                                | Outcomes relevant for the present meta-analysis mentioned in the full CSR were reported in the Journal article. |
| Selective reporting             | UNCLEAR                                            | Not specified.                                                                                                  |
| Other bias                      | HIGH                                               | No information on how other bias was preserved.                                                                 |
| Notes                           | First author unable to provide additional details. |                                                                                                                 |

**Simonovich VA et al [28]**

| ITEM                            | RATING  | SUPPORT                                                                                                                                                          |
|---------------------------------|---------|------------------------------------------------------------------------------------------------------------------------------------------------------------------|
| Random sequence generation      | LOW     | Received medications and placebo in a random order, double-blind .                                                                                               |
| Allocation concealment          | LOW     | Information from full CSR, Method of Assigning Subjects to Treatment Groups.                                                                                     |
| Blinding participants/personnel | LOW     | “Investigator and the patient were blinded to treatment. To maintain blinding, all investigational products were supplied.“ Information from full CSR, Blinding. |
| Blinding assessor               | LOW     | “Investigator and the patient were blinded to treatment. To maintain blinding, all investigational products were supplied.“ Information from full CSR, Blinding. |
| Incomplete data outcome         | LOW     | Outcomes relevant for the present meta-analysis mentioned in the full CSR were reported in the Journal article.                                                  |
| Selective reporting             | LOW     | Outcomes listed in short CSR reported in the journal article.                                                                                                    |
| Other bias                      | UNCLEAR | Not specified.                                                                                                                                                   |

|       |                                                                        |
|-------|------------------------------------------------------------------------|
| Notes | First author contacted but not able to provide additional information. |
|-------|------------------------------------------------------------------------|

**Veiga VC et al [29]**

| ITEM                            | RATING                                                                 | SUPPORT                                                                                                                                                          |
|---------------------------------|------------------------------------------------------------------------|------------------------------------------------------------------------------------------------------------------------------------------------------------------|
| Random sequence generation      | LOW                                                                    | Received medications and placebo in a random order, double-blind .                                                                                               |
| Allocation concealment          | LOW                                                                    | Information from full CSR, Method of Assigning Subjects to Treatment Groups.                                                                                     |
| Blinding participants/personnel | LOW                                                                    | “Investigator and the patient were blinded to treatment. To maintain blinding, all investigational products were supplied.“ Information from full CSR, Blinding. |
| Blinding assessor               | LOW                                                                    | “Investigator and the patient were blinded to treatment. To maintain blinding, all investigational products were supplied.“ Information from full CSR, Blinding. |
| Incomplete data outcome         | LOW                                                                    | Outcomes relevant for the present meta-analysis mentioned in the full CSR were reported in the Journal article.                                                  |
| Selective reporting             | UNCLEAR                                                                | Not specified.                                                                                                                                                   |
| Other bias                      | UNCLEAR                                                                | Not specified.                                                                                                                                                   |
| Notes                           | First author contacted but not able to provide additional information. |                                                                                                                                                                  |

**Zhong M et al [30]**

| ITEM                            | RATING                                              | SUPPORT                                                                                                                                                          |
|---------------------------------|-----------------------------------------------------|------------------------------------------------------------------------------------------------------------------------------------------------------------------|
| Random sequence generation      | LOW                                                 | Received medications and placebo in a random order, double-blind .                                                                                               |
| Allocation concealment          | LOW                                                 | Information from full CSR, Method of Assigning Subjects to Treatment Groups.                                                                                     |
| Blinding participants/personnel | LOW                                                 | “Investigator and the patient were blinded to treatment. To maintain blinding, all investigational products were supplied.“ Information from full CSR, Blinding. |
| Blinding assessor               | UNCLEAR                                             | Not specified.                                                                                                                                                   |
| Incomplete data outcome         | UNCLEAR                                             | Not specified.                                                                                                                                                   |
| Selective reporting             | UNCLEAR                                             | Not specified.                                                                                                                                                   |
| Other bias                      | HIGH                                                | No information on how other bias was preserved.                                                                                                                  |
| Notes                           | Authors not able to provide additional information. |                                                                                                                                                                  |
