# Supplementary material
Source: PubMed Central journal article supplement (PMC9015508)
Supplement: JMV-94-1617-s008.pdf [file JMV-94-1617-s008.pdf]

**TABLE S1** Details of included studies for randomised controlled trials of medications in patients with severe COVID-19

| Author name (references)      | Publication year | Country/Countries of origin | Study design | Method of COVID-19 testing | Numbers of participants | Gender                               | Age (years) | Interventions                   | Treatment medication dose                                                                           | Controls     | Control medication dose                                                                                                                                                                                                   | Follow-up time (days) | Primary outcomes    |
|-------------------------------|------------------|-----------------------------|--------------|----------------------------|-------------------------|--------------------------------------|-------------|---------------------------------|-----------------------------------------------------------------------------------------------------|--------------|---------------------------------------------------------------------------------------------------------------------------------------------------------------------------------------------------------------------------|-----------------------|---------------------|
| Avendano Sola C et al [17]    | 2020             | Spain                       | MRCTs        | RT-PCR                     | 81                      | Males (n = 44);<br>Females (n = 37)  | ≥ 18        | Convalescent plasma (n= 38)     | Receive one dose (250-300 mL) of convalescent plasma                                                | SOC (n = 43) | Not specified                                                                                                                                                                                                             | 97                    | ACM; ratio of TEAEs |
| Cao B et al [18]              | 2020             | China                       | RCTs         | RT-PCR                     | 199                     | Males (n = 120);<br>Females (n = 79) | ≥ 18        | Lopinavir/ ritonavir (n= 99)    | Lopinavir–ritonavir (400 mg and 100 mg: respectively) twice a day for 14 days                       | SOC (n= 100) | Not specified                                                                                                                                                                                                             | 28                    | ACM; ratio of TEAEs |
| Davoudi-Monfared E et al [19] | 2020             | Iran                        | RCTs         | RT-PCR                     | 81                      | Males (n = 44);<br>Females (n = 37)  | ≥ 18        | Interferon-beta-1a/SOC (n = 42) | 44 mg/ml (12 million IU/ml) dose of interferon-beta-1a three times weekly for two consecutive weeks | SOC (n = 39) | Hydroxychloroquine (400 mg twice a day [BID] on the first day and then 200 mg BD) plus lopinavir/ritonavir (400 and 100 mg: respectively: BD) or atazanavir-ritonavir (300 and 100 mg: respectively: daily) for 7–10 days | 28                    | ACM; ratio of TEAEs |
| Edalatifard M et al [20]      | 2020             | Iran                        | RCTs         | RT-PCR                     | 62                      | Males (n = 39);<br>Females (n = 23)  | ≥ 18        | Methylprednisolone/SOC (n = 34) | Intravenous injection: 250 mg per day for 3 days                                                    | SOC (n = 28) | Hydroxychloroquine sulfate: lopinavir and naproxen                                                                                                                                                                        | 48                    | ACM                 |

|                        |      |                                                                                            |          |        |     |                                       |           |                                  |                                                                                           |                  |                                                                                                    |    |                     |
|------------------------|------|--------------------------------------------------------------------------------------------|----------|--------|-----|---------------------------------------|-----------|----------------------------------|-------------------------------------------------------------------------------------------|------------------|----------------------------------------------------------------------------------------------------|----|---------------------|
| Furtado RHM et al [21] | 2020 | Brazil                                                                                     | MDRCTs   | RT-PCR | 397 | Males (n = 262);<br>Females (n = 135) | $\geq 18$ | Azithromycin/ SOC (n = 214)      | 500 mg azithromycin once daily plus SOC for 10 days                                       | SOC (n = 183)    | SOC without macrolides: at the discretion of treating physicians and according to local guidelines | 29 | ACM; ratio of TEAEs |
| Lescure FX et al [22]  | 2021 | Argentina, Brazil, Canada, Chile, France, Germany, Israel, Italy, Japan, Russia, and Spain | MDRPC Ts | RT-PCR | 416 | Males (n = 261);<br>Females (n = 155) | $\geq 18$ | Sarilumab 400 mg (n = 173)       | Intravenous sarilumab 400 mg                                                              | Placebo (n = 84) | Not specified                                                                                      | 60 | ACM; ratio of TEAEs |
| Lescure FX et al [22]  | 2021 | Argentina, E                                                                               | MDRPCT   | RT-PCR | 416 | Males (n = 261);<br>Females (n = 155) | $\geq 18$ | Sarilumab 200 mg (n = 159)       | Intravenous sarilumab 200 mg                                                              | Placebo (n = 84) | Not specified                                                                                      | 60 | ACM; ratio of TEAEs |
| Li L et al [23]        | 2020 | China                                                                                      | MRCTs    | RT-PCR | 103 | Males (n = 60);<br>Females (n = 43)   | $\geq 18$ | Convalescent plasma/SOC (n = 52) | The dose of convalescent plasma was approximately 4 to 13 mL/kg of recipient body weight. | SOC (n = 51)     | Not specified                                                                                      | 74 | ACM                 |

|                            |               |      |        |      |                                      |      |                      |                                                                                                                                                                                                         |               |                                                                                          |    |     |
|----------------------------|---------------|------|--------|------|--------------------------------------|------|----------------------|---------------------------------------------------------------------------------------------------------------------------------------------------------------------------------------------------------|---------------|------------------------------------------------------------------------------------------|----|-----|
| Miller J et al [24] 2020   | American      | RCTs | RT-PCR | 30   | Males (n =14);<br>Females (n =16)    | ≥ 18 | Auxora (n = 20)      | Auxora was administered on three consecutive days as a 4-h continuous intravenous infusion. The initial dose was 2.0mg/kg (max 250 mg); and subsequent doses were 1.6 mg/kg (max 200 mg) at 24 and 48 h | SOC (n = 10)  | Not specified                                                                            | 30 | ACM |
| Olender SA et al [25] 2020 | United States | RCTs | RT-PCR | 1114 | Males (n =672);<br>Females (n = 442) | ≥ 18 | Remdesivir (n = 298) | Remdesivir 200 mg on day 1: followed by remdesivir 100 mg daily on days 2–5; or SOC plus remdesivir 200 mg on day 1: followed by remdesivir 100 mg daily on days 2–10                                   | SOC (n = 816) | Allowed to receive medications that may potentially treat COVID-19: excluding remdesivir | 30 | ACM |

|                          |      |           |       |        |     |                                     |          |                               |                                                                                                                                                                              |                   |                                                                                                                                              |    |                     |
|--------------------------|------|-----------|-------|--------|-----|-------------------------------------|----------|-------------------------------|------------------------------------------------------------------------------------------------------------------------------------------------------------------------------|-------------------|----------------------------------------------------------------------------------------------------------------------------------------------|----|---------------------|
| Rahmani H et al [26]     | 2020 | Iran      | RCTs  | RT-PCR | 66  | Males (n =39);<br>Females (n =27)   | ≥ 18     | Interferon-beta-1b (n = 33)   | Patients in the interferon group received interferon-beta-1b (250 mcg subcutaneously every other day for two consecutive weeks) along with the national protocol medications | SOC (n = 33)      | Patients received only the national protocol medications (lopinavir/ritonavir or atazanavir/ritonavir plus hydroxychloroquine for 7–10 days) | 28 | ACM                 |
| Rasheed AM et al [27]    | 2020 | Iraq      | RCTs  | RT-PCR | 49  | Not specified                       | ≥ 18     | Convalescent plasma (n = 21)  | Not specified                                                                                                                                                                | SOC (n = 28)      | Not specified                                                                                                                                | 60 | ACM; ratio of TEAEs |
| Simonovich VA et al [28] | 2020 | Argentina | RPCTs | RT-PCR | 333 | Males (n =225);<br>Females (n =108) | ≥ 18     | Convalescent plasma (n = 228) | Received convalescent plasma                                                                                                                                                 | Placebo (n = 105) | Not specified                                                                                                                                | 30 | ACM; ratio of TEAEs |
| Veiga VC et al [29]      | 2021 | Portugal  | DRCTs | RT-PCR | 129 | Males(n=88);<br>Females(n=41)       | ≥ 18     | Tocilizumab/ SOC (n = 65)     | Single intravenous infusion of 8 mg/kg                                                                                                                                       | SOC (n = 64)      | Not specified                                                                                                                                | 15 | ACM                 |
| Zhong M et al [30]       | 2020 | China     | RPCTs | RT-PCR | 17  | Males (n =13 );<br>Females (n = 4)  | 51 to 91 | α-Lipoic acid (n = 8)         | 1200 mg/d, intravenous infusion                                                                                                                                              | Placebo (n = 9)   | Equal volume saline infusion (placebo) for 7 days                                                                                            | 30 | ACM                 |

Abbreviations: RCTs, randomised controlled trials; COVID-19, coronavirus disease 2019; RPCTs, randomised placebo-controlled trials; MRCTs, multicenter; randomised controlled trials; DRCTs, double-blind; randomised controlled trials; MDRCTs, multicenter; double-blind; randomised controlled trials; MDRPCTs, multicenter; double-blind; randomised placebo-controlled trials; RT-PCR, reverse transcription-polymerase chain reaction; SOC, standard of care; ACM, all-cause mortality; TEAEs, treatment-emergent adverse events.
