# Supplementary material
Source: PubMed Central journal article supplement (PMC9015508)

**A**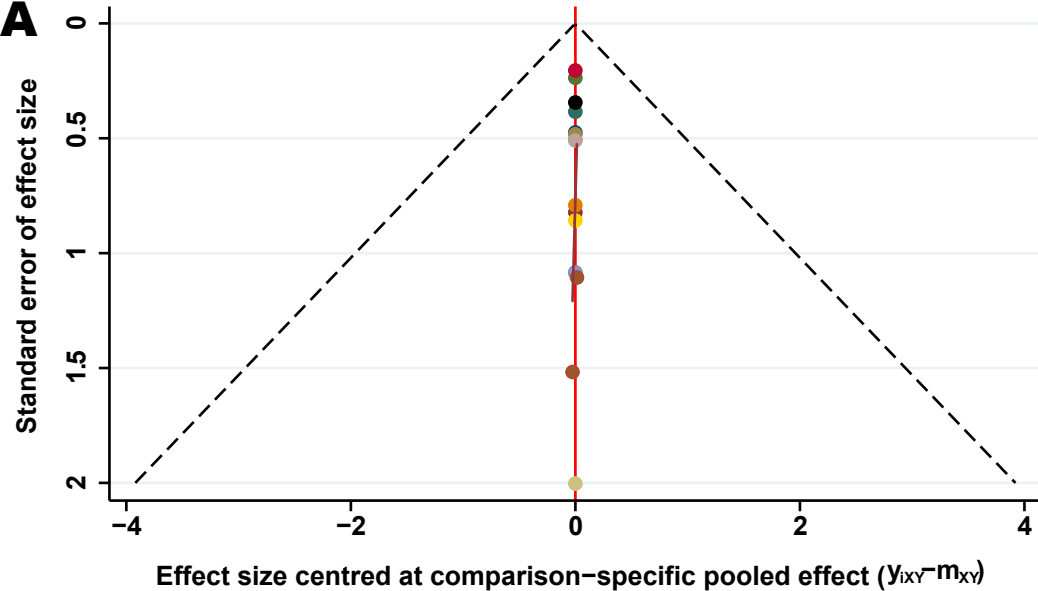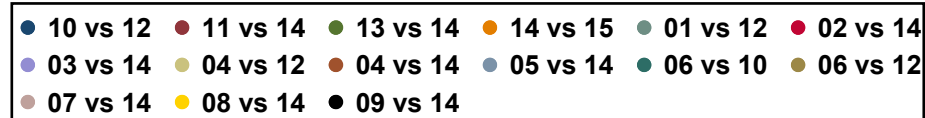**B**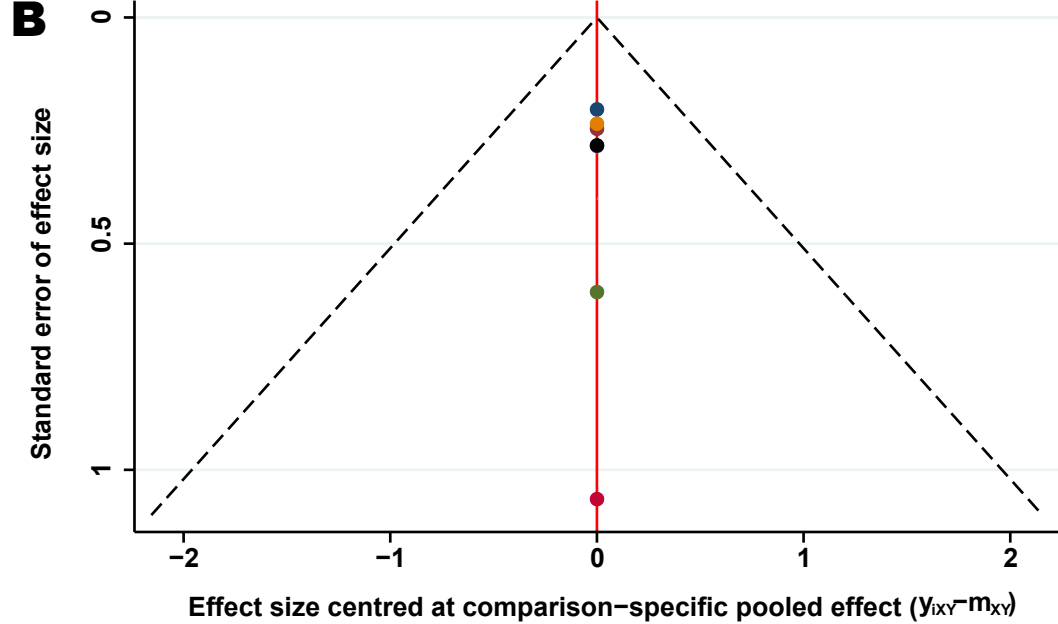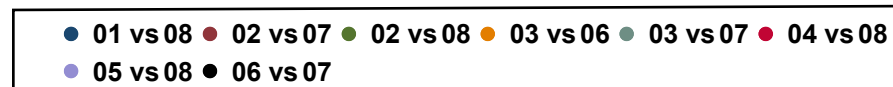

Supplement: JMV-94-1617-s007.pdf [file JMV-94-1617-s007.pdf]
